# Supplementary material
Source: Springer Nature journal article supplement (https://www.springermedizin.de/resource/supplementary/13054_2013_2867_MOESM2_ESM.pdf/9714006)

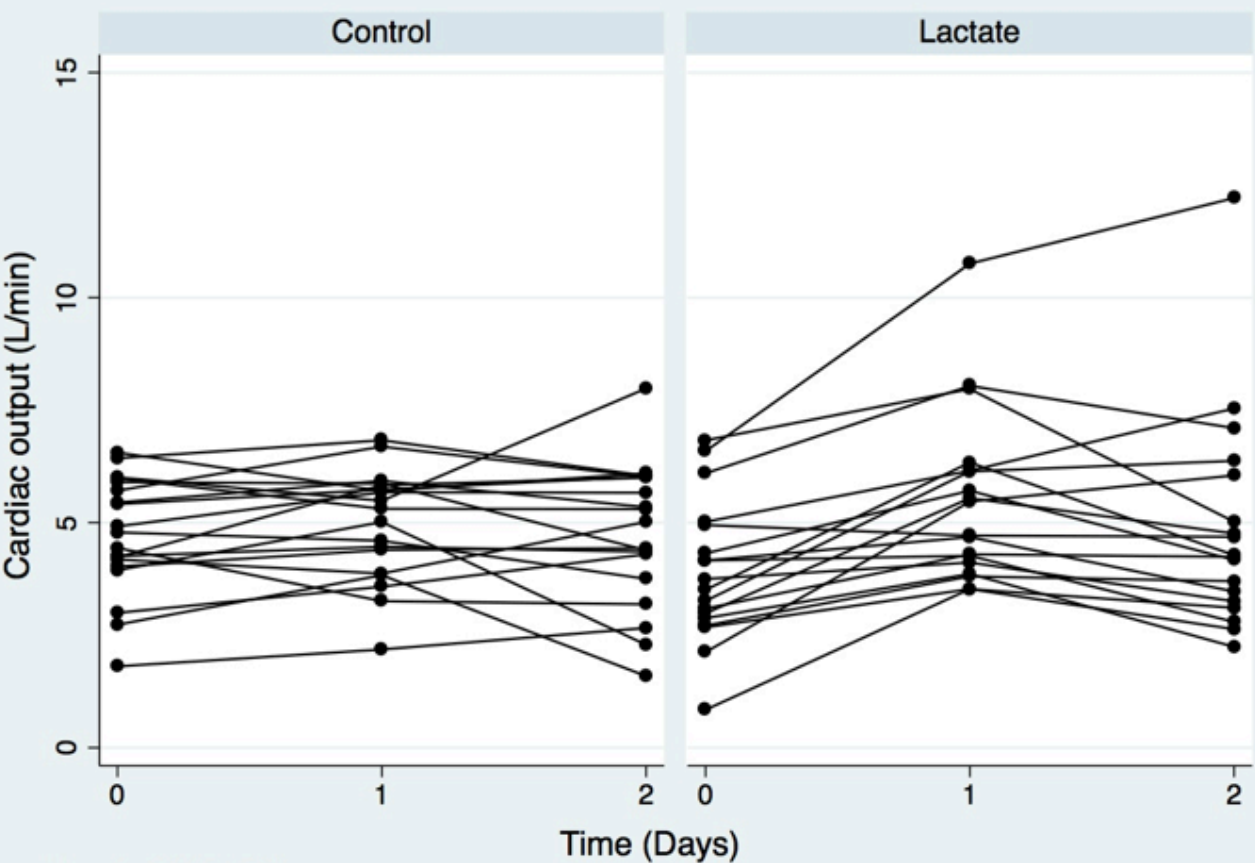

Time: 1=24 h; 2=48 h

Supplement: MOESM2 [file 9714006]
